# Supplementary material for: Dynamic intercellular transport modulates the spatial patterning of differentiation during early neural commitment
Source: PubMed Central journal article supplement (PMC6173785; doi:10.1038/s41467-018-06693-1), 2018-10-05
Supplement: 41467_2018_6693_MOESM2_ESM.pdf [file 41467_2018_6693_MOESM2_ESM.pdf]

## **Description of Additional Supplementary Files**

File Name: Supplementary Movie 1

Description: Asynchronous cell cycle implemented in colony growth and differentiation

File Name: Supplementary Movie 2

Description: Synchronized cell cycle implemented in colony growth and differentiation
